# Supplementary material
Source: PubMed Central journal article supplement (PMC4036287)
Supplement: supp_M113.525014_jbc.M113.525014-1.pdf [file supp_M113.525014_jbc.M113.525014-1.pdf]

**Supplemental Information**

**Blockade of Fas signaling in breast cancer cells suppresses tumor growth and metastasis  
via disruption of Fas signaling-initiated cancer-related inflammation**

Qiuyan Liu,<sup>1,\*</sup> Qinchun Tan<sup>1,2,\*</sup>, Yuanyuan Zheng<sup>1</sup>, Kun Chen<sup>2</sup>, Cheng Qian<sup>1</sup>,  
Qingqing Wang<sup>2</sup> and Xuetao Cao<sup>1,2,3</sup>

**Supplemental Table 1. Clinical characteristics of the patients**

| Variable                     | Cohort 1<br>(N=119) | Cohort 2<br>(N=30) | P Value |
|------------------------------|---------------------|--------------------|---------|
| Age - year                   |                     |                    | 0.724   |
| Median                       | 50                  | 52                 |         |
| Range                        | 29-83               | 31-66              |         |
| Tumor size - no. (%)         |                     |                    | 0.347   |
| < 5 cm                       | 108<br>(83.1)       | 27 (90.0)          |         |
| ≥ 5 cm                       | 22<br>(16.9)        | 3 (10.0)           |         |
| Histological grade - no. (%) |                     |                    | 0.097   |
| < II                         | 40 (30.8)           | 14 (46.7)          |         |
| ≥ II                         | 90 (69.2)           | 16 (53.3)          |         |
| LN invasion - no. (%)        |                     |                    | 0.546   |
| Negative                     | 122 (93.8)          | 29 (96.7)          |         |
| Positive                     | 8 (6.2)             | 1 (3.3)            |         |
| TNM stage – no. (%)          |                     |                    | 0.475   |
| I~II                         | 82 (63.1)           | 21 (70.0)          |         |
| III                          | 48 (36.9)           | 9 (30.0)           |         |

*P* value of less than 0.05 was considered to indicate statistical significance. *P* values were calculated in SPSS 17.0 using chi-square test, except for age, which was calculated using t-tests. Abbreviations: LN, lymph node; TNM, tumor-node-metastasis.

Supplemental Table 2. Univariate and multivariate analysis of factors associated with overall survival

| Clinical variables                     | Cohort 1 N=119        |         |
|----------------------------------------|-----------------------|---------|
|                                        | Hazard ratio (95% CI) | P value |
| Univariate analysis                    |                       |         |
| Fas (higher versus lower) <sup>1</sup> | 2.92 (1.42-5.96)      | 0.003   |
| Age (≥50 versus <50 years)             | 1.11 (0.57-2.17)      | 0.753   |
| Histological grade (>II versus I/II)   | 1.32 (0.63-2.75)      | 0.460   |
| Tumor size (≥5 cm versus <5 cm)        | 2.09 (0.98-4.47)      | 0.056   |
| LN invasion (yes versus no)            | 0.82 (0.42-1.59)      | 0.559   |
| TNM stage (III versus I-II)            | 2.02 (1.03-3.96)      | 0.038   |
| Multivariate analysis                  |                       |         |
| Fas (higher versus lower) <sup>1</sup> | 2.45 (1.16-5.18)      | 0.018   |
| Age (≥50 versus <50 years)             | 1.18 (0.58-2.38)      | 0.649   |
| Histological grade (>II versus I/II)   | 1.37 (0.65-2.90)      | 0.399   |
| Tumor size (≥5 cm versus <5 cm)        | 1.73 (0.73-4.08)      | 0.206   |
| LN invasion (yes versus no)            | 0.38 (0.14-1.04)      | 0.058   |
| TNM stage (III versus I-II)            | 2.68 (0.92-7.79)      | 0.069   |

Analysis was conducted on breast cancer patients of Cohort 1. Hazard ratios (95% confidence interval) and P values were calculated using univariate or multivariate Cox proportional hazards regression in SPSS 17.0.

Fas expression was measured by defining regions of interest (ROI) using automated cell acquisition and quantification software for immunohistochemistry (Histoquest). Staining intensity more than 5% was considered positive and more than 50% was considered higher Fas expression.

Abbreviations: CI, confidence interval; TNM, LN, lymph node; tumor-node-metastasis.

Supplemental Table 3. Fas expression and clinical characteristics of the patients

| Variable                 | Cohort1 |    |       | Cohort2 |    |       |
|--------------------------|---------|----|-------|---------|----|-------|
|                          | N/L     | H  | p     | N/L     | H  | p     |
| Age - year               |         |    | 0.745 |         |    | 0.789 |
| < 50                     | 30      | 25 |       | 4       | 7  |       |
| ≥ 50                     | 33      | 31 |       | 6       | 13 |       |
| Tumor size - no.         |         |    | 0.047 |         |    | 0.719 |
| < 5 cm                   | 56      | 42 |       | 9       | 18 |       |
| ≥ 5 cm                   | 7       | 14 |       | 1       | 2  |       |
| Histological grade - no. |         |    | 0.647 |         |    | 0.650 |
| < II                     | 20      | 20 |       | 5       | 10 |       |
| ≥ II                     | 43      | 36 |       | 5       | 10 |       |
| LN invasion - no.        |         |    | 0.442 |         |    | 0.700 |
| Negative                 | 28      | 21 |       | 9       | 20 |       |
| Positive                 | 35      | 35 |       | 0       | 1  |       |
| TNM stage – no.          |         |    | 0.000 |         |    | 0.012 |
| I~II                     | 31      | 12 |       | 10      | 11 |       |
| III                      | 25      | 51 |       | 0       | 9  |       |

P values were calculated in SPSS 17.0 using Pearson chi-square test. And P value of less than 0.05 was considered to indicate statistical significance.

Abbreviations: N/L, negative/lower; H, higher; LN, lymph node; TNM, tumor-node-metastasis.

Fas expression was measured by defining regions of interest (ROI) using automated cell acquisition and quantification software for immunohistochemistry (Histoquest) in a FACS-like manner of scattergram analysis. Staining intensity more than 5% was considered positive and more than 50% was considered higher Fas expression.

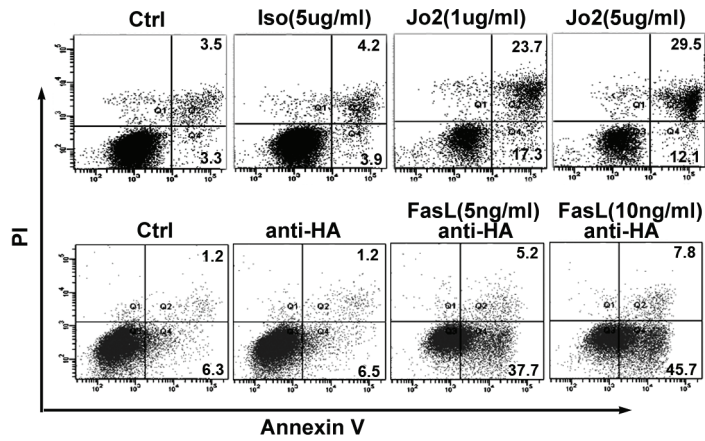

**Supplemental Figure 1. Susceptibility of Fas-induced apoptosis in murine embryonic liver cells (BNL CL.2)**

A. BNL CL.2 cells were treated with or without agonistic anti-Fas antibody, Jo2, or cross-linking Fas ligand at the indicated concentrations for 12 hours. Apoptosis cells were measured by staining with Annexin V-FITC and PI and detected by FACS.

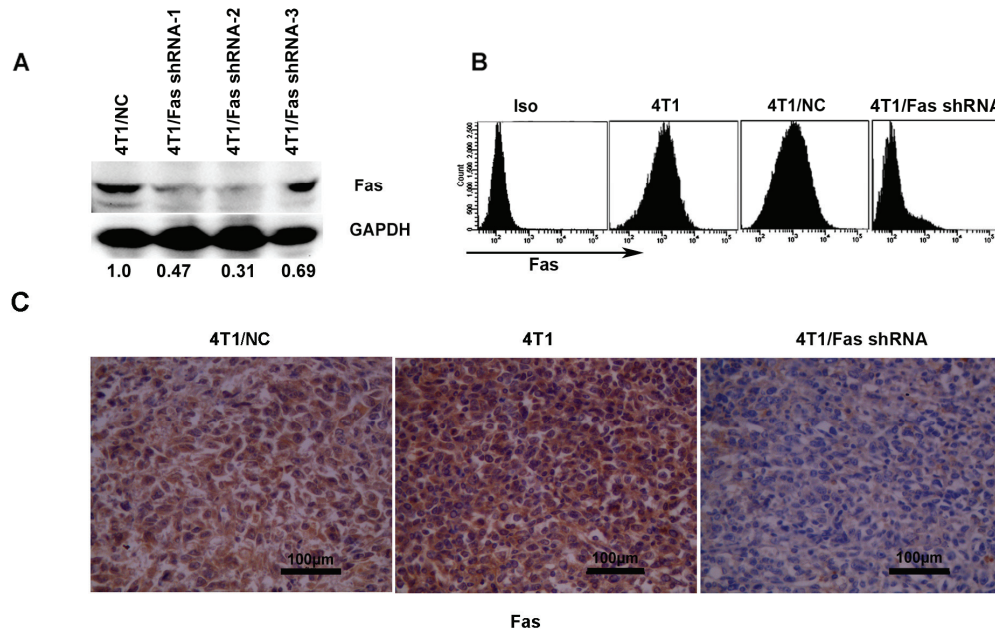

**Supplemental Figure 2. The expression of Fas in stably Fas-silenced 4T1 cells and tumor tissue derived from tumor-bearing mice**

A, B. Expression of Fas in stably Fas-silenced 4T1 cell clones was identified by Western blot assay (A) and flow cytometry (B). C. Expression of Fas in tumor tissue derived from tumor-bearing mice was detected by immunohistochemistry (IHC). The results represent 3 independent experiments with similar results, bar represents 100µm.

Liu et al, Suppl. Figure 3

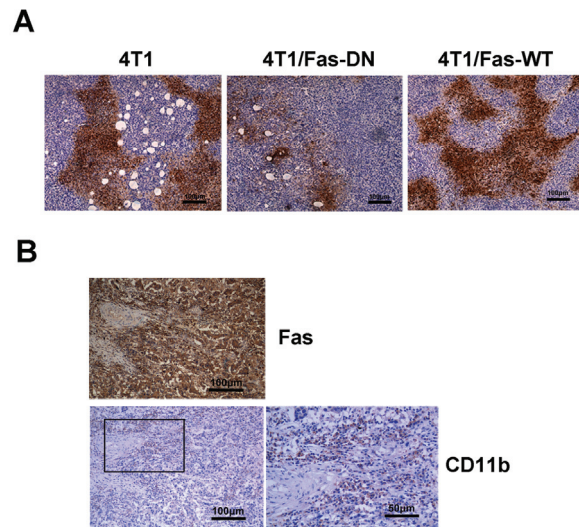

**Supplemental Figure 3. The infiltration and location of MDSCs in tumor tissue derived from tumor-bearing mice and human breast cancer tissues**

A. Gr1<sup>+</sup> MDSCs infiltration and location in tumor tissue derived from tumor-bearing mice was detected by IHC. One representative image is shown, bar represents 100µm. B. One representative image of infiltration and location of CD11b<sup>+</sup> MDSCs in human breast cancer tissues with Fas higher expression.

Liu et al, Suppl. Figure 4

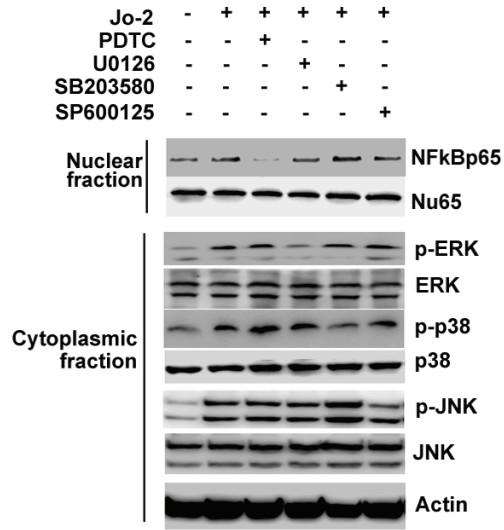

**Supplemental Figure 4. Blocking effect of signaling inhibitors on MAPK and NF- $\kappa$ B signaling pathway in breast cancer cells**

$1 \times 10^6$  4T1 cells were pre-treated with MER1/2 inhibitor, U0126 (30 $\mu$ M); JNK/SAPK inhibitor, SP600125 (40 $\mu$ M); p38 MAPK inhibitor, SB203580 (30 $\mu$ M); and NF- $\kappa$ B inhibitor, PDTC (15 $\mu$ M), for 30 min prior to Jo2 simulation. The blocking effect of signaling inhibitors in MAPK and NF- $\kappa$ B signal pathways was detected by Western blot analysis.



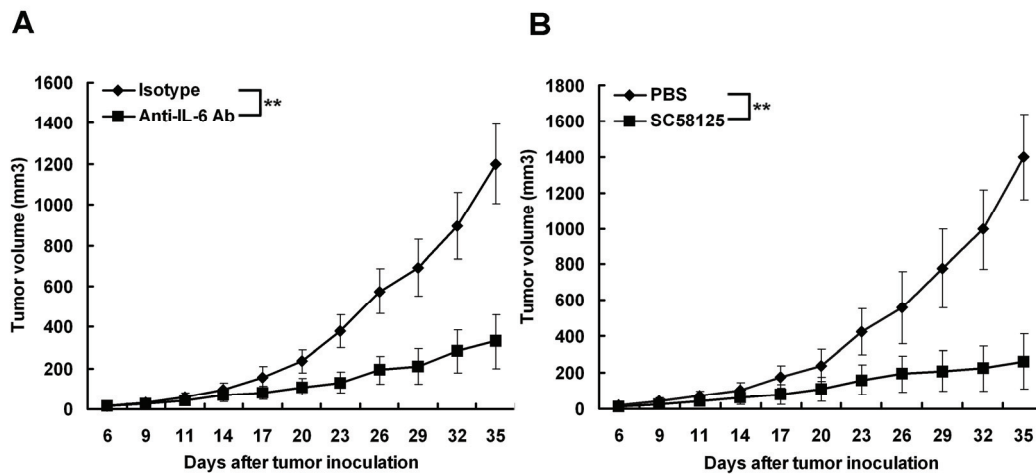

**Supplemental Figure 5. Suppression of tumor growth *in vivo* by anti-IL6 Ab or COX2 inhibitor**

A, B.  $5 \times 10^5$  4T1 cells were inoculated subcutaneously into the flank of BALB/c mice, 125 $\mu$ g anti-IL-6 Ab and control Isotype (mouse IgG) (A), or COX2 inhibitor SC58125 (5mg/kg) and PBS (B) were injected *i.p.* once a day for 14 days. Tumor growth was monitored and analyzed as described in the Materials and Methods. Tumor size was compared at various time points and *P* values are denoted. \*\*,  $p < 0.01$ .

**A**

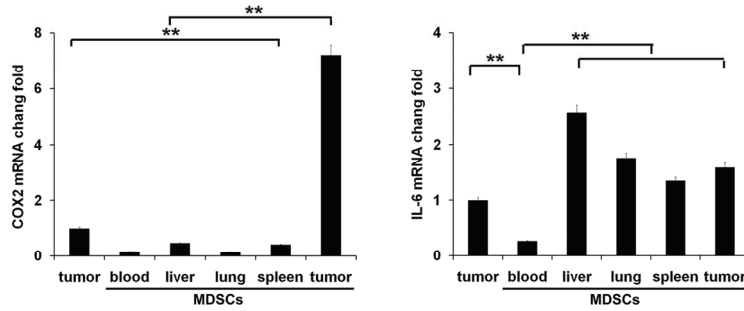

**B**

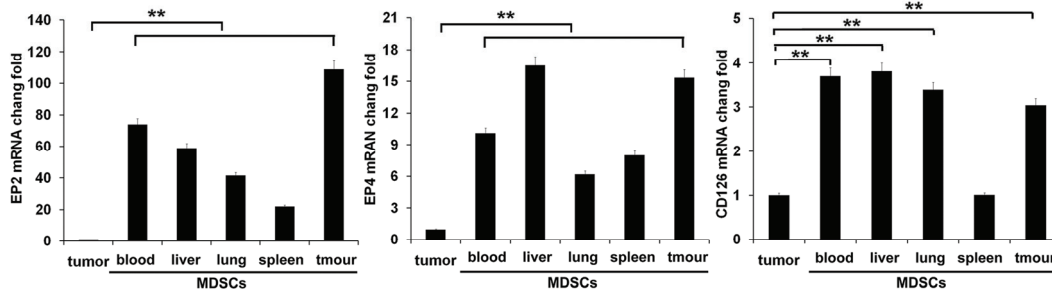

**Supplemental Figure 6. Expression of IL-6, COX2, and their receptors in primary tumor tissue and MDSCs derived from 4T1-bearing mice**

A, B.  $5 \times 10^5$  4T1/siFas and 4T1/NC cells were inoculated subcutaneously into the flank of BALB/c mice. 40 days later, peripheral blood, spleen, liver, lung, and draining lymph node (DLN) and tumor tissues from tumor-bearing mice were collected. The expression of IL-6, COX2 (A) and their receptors (CD126, EP2/EP4) (B) in primary tumor tissue and MDSCs sorting by Gr1<sup>+</sup>CD11b<sup>+</sup> cells from liver, lung, spleen, peripheral blood, and primary tumor tissue derived from 4T1-bearing mice were analyzed by real-time PCR. \*\*,  $p < 0.01$ .
